# Supplementary material
Source: ML conference proceedings conference paper supplement (https://openreview.net/forum?id=zQqDqfja4Y)
Supplement: supplementary_material [file Supplementary_Material_16669.pdf › Supplementary_Material_16669.pdf]

---

# Depth-Supervised Fusion Network for Seamless-Free Image Stitching

---

Anonymous Author(s)

Affiliation

Address

email

## 1 A Supplementary Material

2 In this document, we provide more qualitative evaluations of our method.

3 **Comparison with Feature Based Methods.**

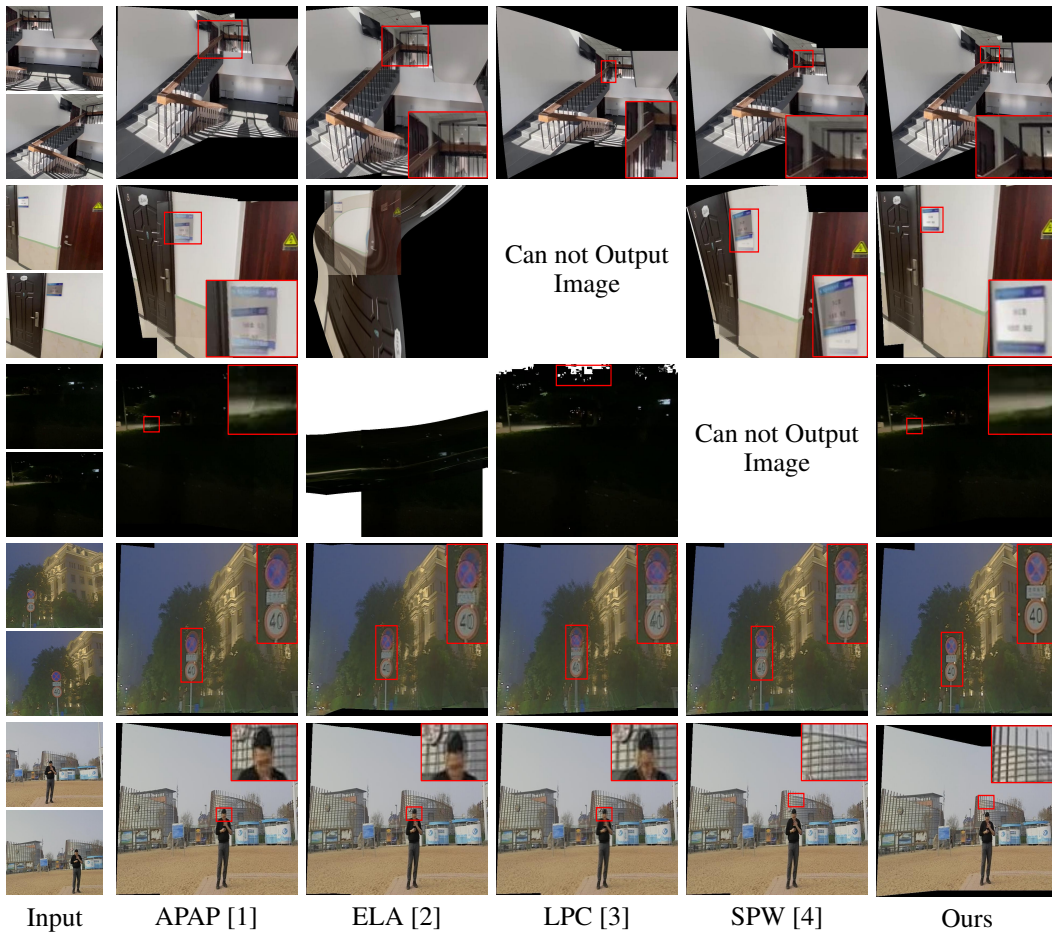

Figure 1: Visual comparison between feature based methods and the proposed method on UDIS-D and IVSD datasets.

We present additional visual comparisons between our method and feature based image stitching methods. As shown in Fig. 1, in challenging scenarios, such as low-light conditions, matte images, or images with textureless overlapping regions, some baseline methods fail to produce valid outputs. In contrast, the proposed method consistently generates high-quality stitched results.

#### Comparison with Deep Learning Based Methods.

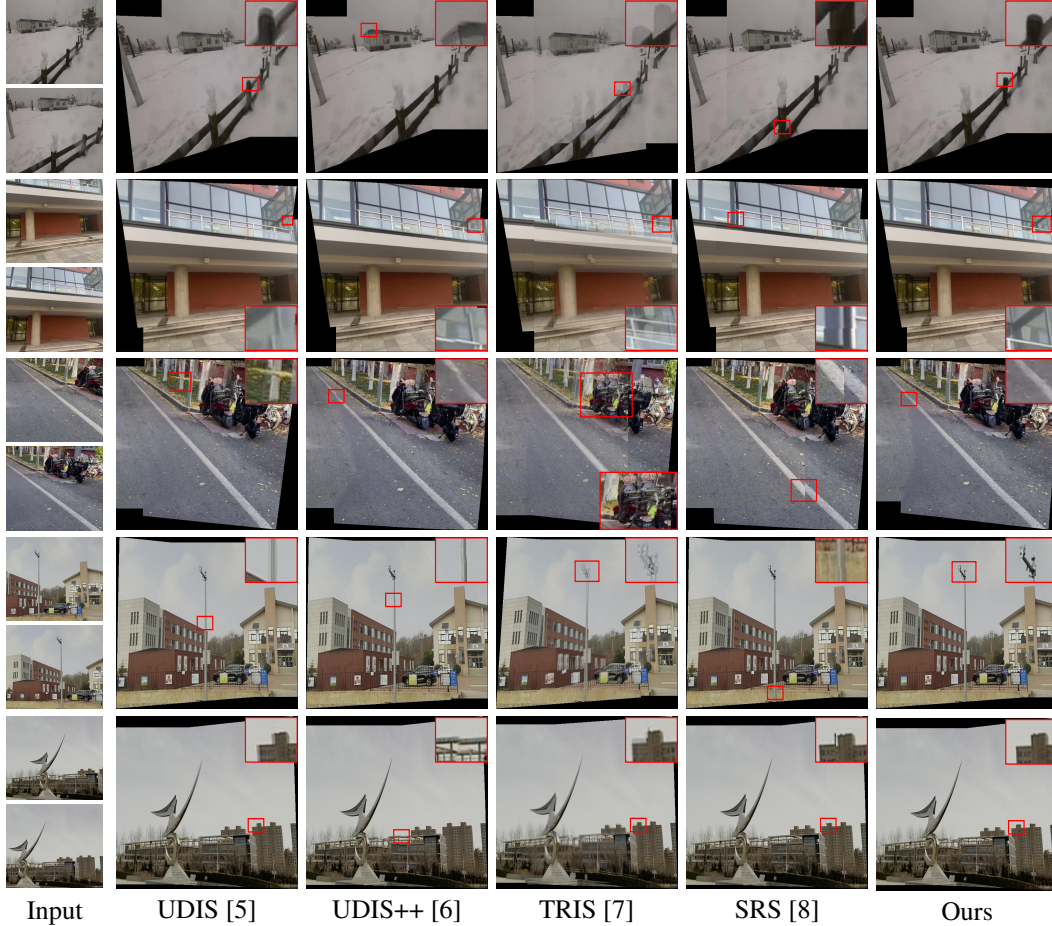

Figure 2: Visual comparison between deep learning based stitching methods and the proposed method on UDIS-D and IVSD datasets.

We further compare our method with state-of-the-art deep learning based stitching methods. While most existing deep learning methods produce roughly aligned results, our approach achieves significant improvements in fine details and eliminates minor structural artifacts, as demonstrated in Fig. 2.

#### References

- [1] Julio Zaragoza, Tat-Jun Chin, Michael S Brown, and David Suter. As-projective-as-possible image stitching with moving dlt. In *IEEE Conf. Comput. Vis. Pattern Recog.*, pages 2339–2346, 2013.
- [2] Jing Li, Zhengming Wang, Shiming Lai, Yongping Zhai, and Maojun Zhang. Parallax-tolerant image stitching based on robust elastic warping. *IEEE Trans. Multimedia*, 20(7):1672–1687, 2017.
- [3] Qi Jia, ZhengJun Li, Xin Fan, Haotian Zhao, Shiyu Teng, Xinchen Ye, and Longin Jan Latecki. Leveraging line-point consistency to preserve structures for wide parallax image stitching. In *IEEE Conf. Comput. Vis. Pattern Recog.*, pages 12186–12195, 2021.

- 23 [4] Tianli Liao and Nan Li. Single-perspective warps in natural image stitching. *IEEE Trans. Image*  
24 *Process.*, 29:724–735, 2019.
- 25 [5] Lang Nie, Chunyu Lin, Kang Liao, Shuaicheng Liu, and Yao Zhao. Unsupervised deep image  
26 stitching: Reconstructing stitched features to images. *IEEE Trans. Image Process.*, 30:6184–6197,  
27 2021.
- 28 [6] Lang Nie, Chunyu Lin, Kang Liao, Shuaicheng Liu, and Yao Zhao. Parallax-tolerant unsupervised  
29 deep image stitching. In *Int. Conf. Comput. Vis.*, pages 7399–7408, 2023.
- 30 [7] Zhiying Jiang, Xingyuan Li, Jinyuan Liu, Xin Fan, and Risheng Liu. Towards robust image  
31 stitching: An adaptive resistance learning against compatible attacks. In *AAAI*, volume 38, pages  
32 2589–2597, 2024.
- 33 [8] Ziqi Xie, Weidong Zhao, Jian Zhao, and Ning Jia. Reconstructing the image stitching pipeline:  
34 Integrating fusion and rectangling into a unified inpainting model. *NeurIPS*, 37:123812–123845,  
35 2024.
